# Supplementary material for: Protection of Human Umbilical Vein Endothelial Cells against Oxidative Stress by MicroRNA‐210
Source: Hindawi journal article supplement (doi:10.1155/2017/3565613), 2017-01-01
Supplement: f1 [file 3565613.f1.pdf]

1

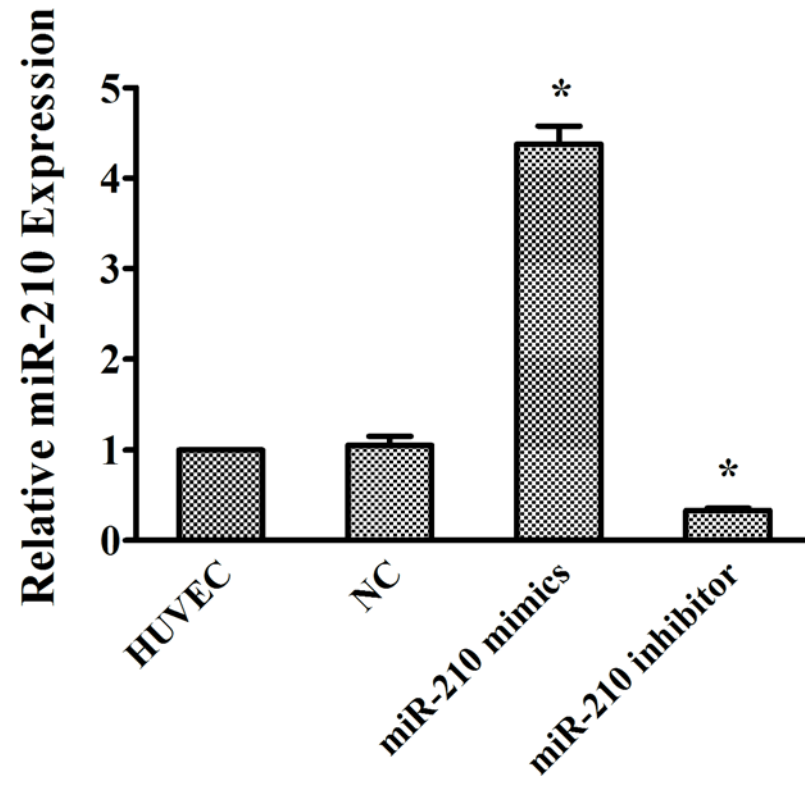

**2A**

**Relative Expression**

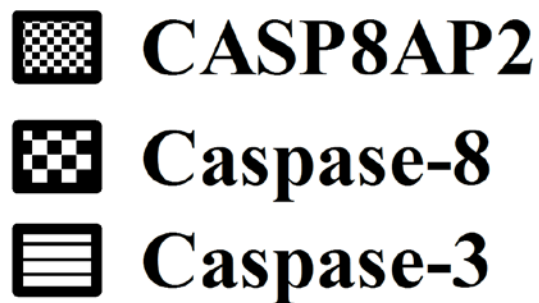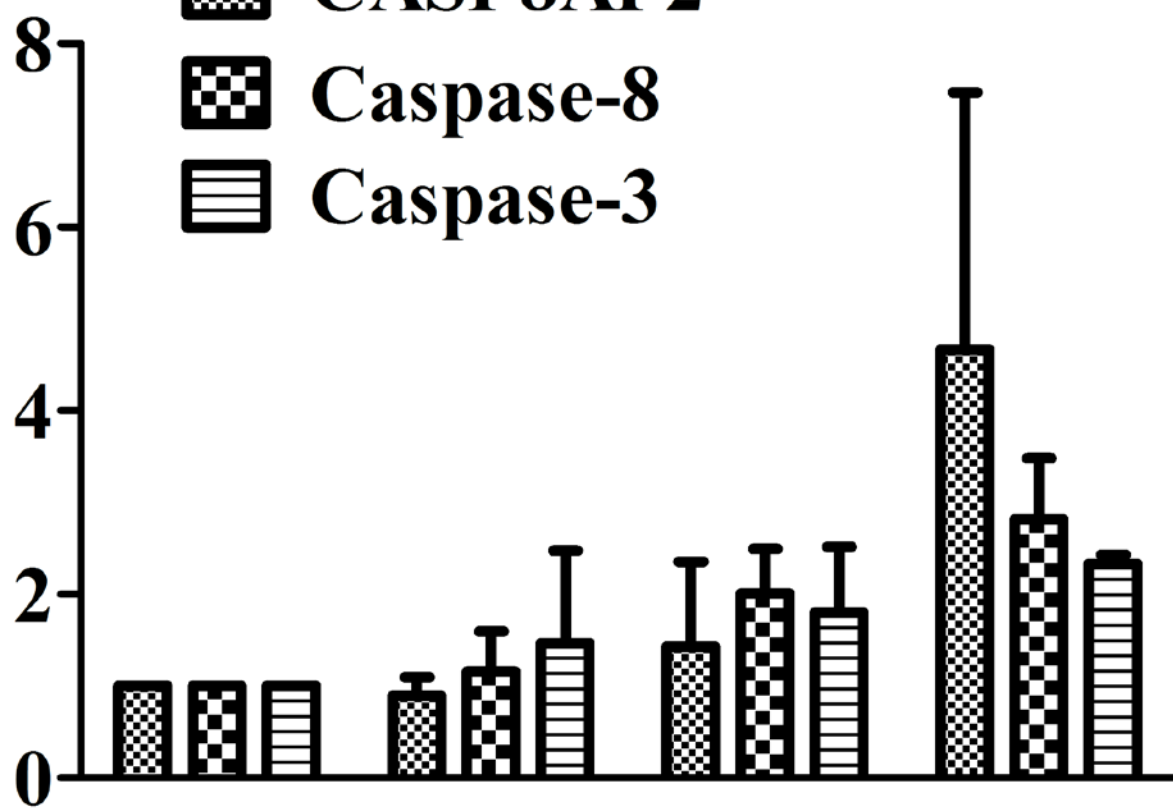

**miR-Scr**    +                      +                      -                      -

**Pre-210**    -                      -                      +                      +

**H2O2**      -                      +                      -                      +

**2B**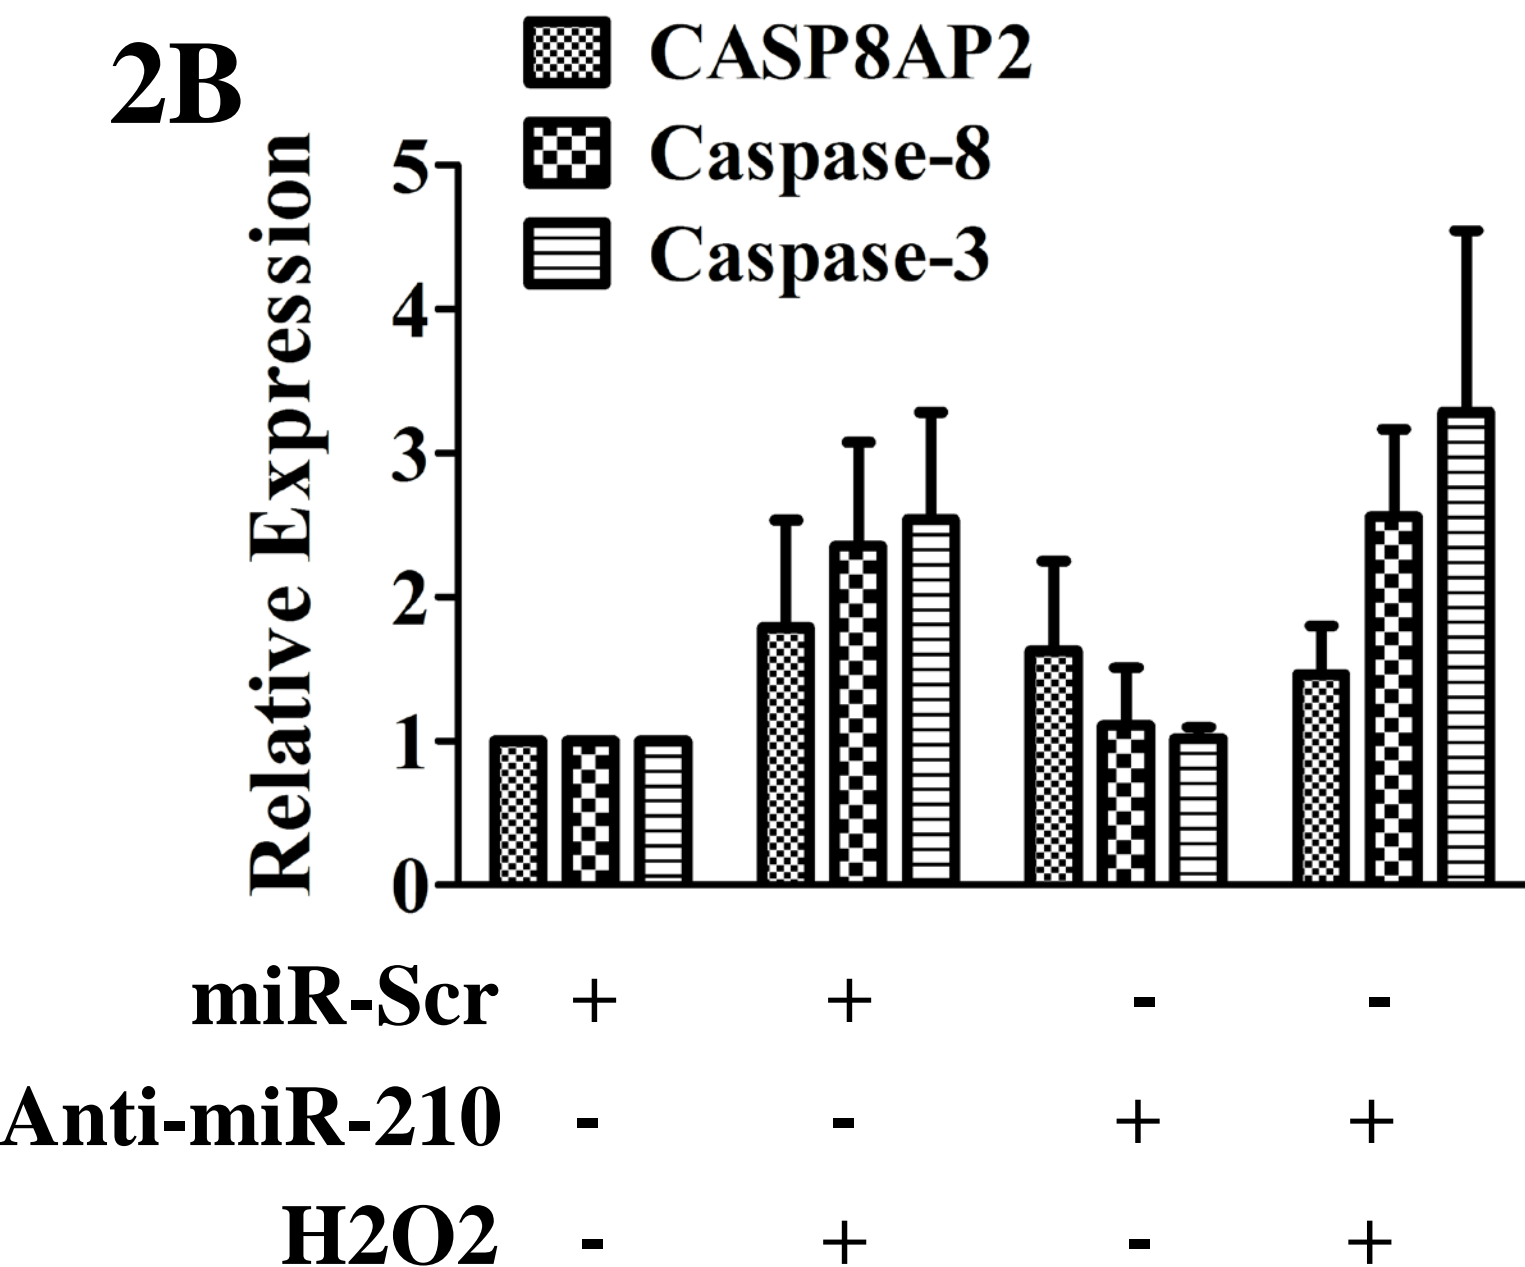

## Supporting Information

**S1 Fig. miR-210 Expression in HUVECs Transfected with miR-210 Mimics, miR-210 Inhibitor, and NC.** qRT-PCR results showing that miR-210 expression increased in cells transfected with miR-210 mimics and decreased in cells transfected with the miR-210 inhibitor when compared with untransfected HUVECs. No difference in miR-210 expression was found between cells transfected with NC and untransfected HUVECs. All  $n = 3$ ,  $*p < 0.05$ .

**S2 Fig. Changes in CASP8AP2 Pathway-Related Gene Expression at the mRNA Level in HUVECs after H<sub>2</sub>O<sub>2</sub> Treatment.** (A) No differences were observed in the mRNA expression of CASP8AP2, caspase-8, and caspase-3 in miR-Scr HUVECs after H<sub>2</sub>O<sub>2</sub> treatment compared with the control. Similarly, no differences were observed in the mRNA expression of CASP8AP2, caspase-8, and caspase-3 between pre-210 HUVECs and miR-Scr HUVECs upon H<sub>2</sub>O<sub>2</sub> treatment. (B) No differences were present in the mRNA expression of CASP8AP2, caspase-8, and caspase-3 between anti-miR-210 HUVECs and miR-Scr HUVECs upon H<sub>2</sub>O<sub>2</sub> treatment. All  $n = 3$ .
